# Supplementary material for: Rapid fabrication of reinforced and cell-laden vascular grafts structurally inspired by human coronary arteries
Source: PubMed Central journal article supplement (PMC6629634; doi:10.1038/s41467-019-11090-3), 2019-07-15
Supplement: 41467_2019_11090_MOESM2_ESM.pdf [file 41467_2019_11090_MOESM2_ESM.pdf]

Reviewers' comments:

Reviewer #1 (Remarks to the Author):

The authors are commended for devising a series of processing methods to approach the multilayered design of the artery with control of the stress-strain curve. In this respect, the accomplishment seems substantial. However, for impact in the field, sufficient strength is required, and these constructs lack it: there is no explicit mention of "strength" that I could find in terms of results presented or how the approach could be modified to achieve it (not that the latter in and of itself would warrant publication in NCOMMS). But inspection of the stress-strain curves, assuming they are plotted to failure, shows the UTS is ~200KPa, about a factor of 10 below the physiological value. Even if 2MPa were achieved, physiological burst pressure would have to be demonstrated to show potential. And for publication in NCOMMS, I would expect beyond that a successful implantation study in the arterial circulation, not subcutaneous as presented here.

Reviewer #2 (Remarks to the Author):

This is an intriguing paper that reports a process for the construction of replacement arteries that effectively mimic the mechanical characteristics of native arteries. The authors describe their innovative fabrication process and show that cells included in the resulting vessels continue to be functional. While the reported methods and results are exciting, there are numerous problems with grammar, word choice, and punctuation that sometimes make it difficult to understand the authors' intent; aside from this, the paper is outstanding. Specific issues to be addressed are described below.

Many of the figures (see 3, 4, and 5) and their associated captions are confusing since the authors don't specify the meaning of all of the curves included in the plots and/or the caption descriptions don't seem to accurately correspond with the content of the plots. These need to be checked and corrected for better comprehension. Also

On line 174, the authors describe a pre-stretching step required to produce the characteristic J-shape of arteries, though little detail is given. It is not clear whether this was done during the fabrication itself, on a layer-by-layer basis as the vessel was formed, or just at the end of the fabrication process. This needs to be clarified. The paper should also specify and justify the extent of the pre-stretch utilized.

It is not clear why the authors chose to perform uniaxial strip tests on the fabricated vessel material, instead of simply testing biaxial behavior. This should be justified.

Table 1 does not appear to be referenced in the text of the manuscript

It is not clear that the cells used in the fabrication are relevant. Why weren't vascular cells (i.e. endothelial cells, smooth muscle cells, fibroblasts) used?

Please describe the details of the vessel culture from days 1 to 7.

Cell survival appears to be equated to function, but it should be made clear that vessel function (e.g. contractility) was not tested in this paper.

SIVG does not appear to be defined anywhere in the paper

Reviewer #3 (Remarks to the Author):

Title: Rapid fabrication of reinforced and cell-laden vascular grafts structurally inspired by human coronary arteries.

Authors: Akentjew, T.L., et al.

General Comments:

This is an interesting paper describing a combination of spinning and hydrogel technologies, that can deposit concentric layers of cell-laden hydrogels that are interspersed with re-inforcing fibers to provide mechanical strength.

Cell layers are contained in a methacryloyl gelatin-alginate (GEAL) substrate, while the reinforcing fibers are made from slow-degrading polycaprolactone (PCL). The idea of interspersing mechanically reinforcing fibers within a living tissue is novel and potentially important. However, this paper has multiple drawbacks that limit enthusiasm substantially. Overall, important information is lacking on the process, and the figures contain many errors and substantially lack clarity. Missing important information includes: what is the diameter of the grafts? How long does the graft manufacturing process take – can cells survive this period? Is the process sterile? How big are the PCL fibers? This is difficult to infer from the paper. What is the phenotype or appearance of the cells in the construct? There is zero histological information. How were MSC harvested and characterized? No information on this either.

Also, there is overall a lack of care in preparation of the paper. The figure legends contain many errors, the statistical analysis is uneven and poor overall, and the Methods descriptions do not comport with the data in the paper. Overall, English grammar should be improved as well.

Specific Comments:

1. Line 123: the statement is made that the GEAL solution is pre-crosslinked, but then the authors state that the dipped layer is exposed to UV light to crosslink the material. please clarify.
2. The phrase "circumferential axis" is used throughout the paper and is unclear to this reviewer.
3. After spraying the PCL layers, do the fibers fuse at the points of contact? What is the data for or against fiber fusion, which will significantly impact the vessel mechanical properties? What is the fiber diameter, is it uniform, how is it controlled?
4. The legend for Figure 4 is very confusing – panels a-c are stated as having data in the grey lines, but these lines are identical across the images, and the dotted lines are not described at all. It is pretty impossible to tell what this figure is saying. Do the authors have data to show on actual stress-strain curves of native human coronary arteries?
5. Similarly the legend for Figure 5 makes no sense – the grey lines and solid squares that are talked about in the legend simply aren't there in the figure. And, panels b-e contain multiple black lines of unclear significance- if these are replicates, then should not some error bars be included or something? In Figures 5 and 7, where is the "grey region of the range of the model of the mechanical properties" derived from? This is not at all clear to the reader, and serves only to confuse.
6. In Table 1, what is the "n" value for these data? This bears on the statistical significance and differences.
7. Figure 8 needs scale bars. What is the meaning of the blue color – does this signal live or dead cells or proliferating cells? What are the dimensions of the construct? The reagent used does not show cell replication per se – it appears to show mitochondrial activity??
8. Figure 9 shows cells counts from histology, but there are no histological images shown in the main paper. This is very disappointing.
9. In the Methods section, the Histology paragraph talks about skin transplants and positive controls for immunity, and talks about FACS analysis using different markers for immune cells, but none of this data is shown in the paper. It appears as if this text was taken from another manuscript, since it does not match up with the data in this paper?

1 Reviewers' comments:

2

3 Reviewer #1 (Remarks to the Author):

4

5 The authors are commended for devising a series of processing methods to approach the  
6 multilayered design of the artery with control of the stress-strain curve. In this respect, the  
7 accomplishment seems substantial. However, for impact in the field, sufficient strength is  
8 required, and these constructs lack it: there is no explicit mention of "strength" that I could  
9 find in terms of results presented or how the approach could be modified to achieve it (not  
10 that the latter in and of itself would warrant publication in NCOMMS). But inspection of the  
11 stress-strain curves, assuming they are plotted to failure, shows the UTS is ~200KPa, about a  
12 factor of 10 below the physiological value. Even if 2MPa were achieved, physiological burst  
13 pressure would have to be demonstrated to show potential. And for publication in NCOMMS,  
14 I would expect beyond that a successful implantation study in the arterial circulation, not  
15 subcutaneous as presented here.

16

17

18 Response: We agree with the reviewer and have conducted experiments to assess questions  
19 about the strength characterization and evaluation of physiological burst pressure of the  
20 constructs. In these regards, sufficient ultimate tensile strength (UTS) was evaluated by  
21 longitudinal tensile testing until fracture of the small diameter vascular graft (SDVG), whereas

22 for physiological burst pressure assessment pressurization testing of SDVGs were conducted  
23 until failure.

24 In our first draft, we initially performed tensile tests using a fixed upper limit of strain to  
25 evaluate mainly the stress-strain J-shape curve, without recording the UTS. Therefore, as well  
26 mentioned by the reviewer, a reader could assume that results were plotted to failure. This is  
27 now clarified in the text and material and methods. In the main text, Line 313 the following is  
28 stated: “The construct exhibited mechanical response similar to human coronary arteries,  
29 both in longitudinal and circumferential directions under uniaxial tensile testing up to a 30%  
30 strain range (Fig. 7a-b).”, and additionally, in material an methods line 781, the following is  
31 mentioned: “Uniaxial tensile testing was performed at a constant strain rate of 1 mm/min and  
32 up to 30% strain (see Fig. S2b).” However, since the failure data is relevant for the application  
33 of this technology, as stated by the reviewer, we included information about the tensile  
34 testing

35 to failure and physiological burst pressure results in the main text and supporting material.  
36 We have summarized these results in line 315 for the resistance until failure: “Longitudinally  
37 tested SDVG exhibited a maximum failure strength of  $520 \pm 56$  kPa, which is in the range of  
38 coronary arteries of individual above 35 years old<sup>18,45</sup> (Fig S4)”. In line 363 the following results  
39 concerning burst pressure were included: “Due to safety and clinical concerns, vascular grafts  
40 must also meet adequate burst pressures and suture retention strength<sup>25,47</sup>.The fabricated  
41 full SDVGs exhibited burst pressures of  $1630 \pm 180$  mmHg, similar to values reported for  
42 human saphenous vein, as well used as autologous graft for coronary bypass<sup>48</sup> (see Fig S5).”.  
43 Being the suture retention strength a particularly important aspect of vascular grafts in  
44 regards to safety and clinical practice, we have included in line 366 additional results of suture

45 retention strength: “Suture retention strength was determined at  $143 \pm 13$  grams-force for  
46 SDVGs, similar to reported values for human internal mammary artery (IMA)<sup>47</sup>(see Fig S6)”.

47 We agree with the reviewer, concerning the need of successful implantation study in the  
48 arterial circulation. To address this issue, we have included a whole new chapter in line 501  
49 title “Implantability study in arterial circulation using a rabbit model”. A preliminary study for  
50 artery grafting was conducted in a rabbit carotid model (1-month period and patency test)  
51 using a total of 6 rabbits, two with artery to artery anastomosis as surgery control, two with  
52 acellularized SDVG and two with BM-MSCs-laden SDVG. During surgery, the grafting  
53 experiments showed good suturing performance, no blood leakage observed, absence of  
54 apparent immunological rejection or inflammation of the implanted grafts and absence of any  
55 unexpected and adverse events during grafting. Except for the anastomosis control all  
56 implanted rabbits showed SDVG patency between 12 h and 36 h. Grafting results are  
57 discussed in line 623-640. We clarified in the discussion too that our SDVG design and iterative  
58 improvement was originally directed to human coronary arteries. Nevertheless, the rabbit  
59 model is an appropriate model to evaluate adverse effect derived from thrombosis and  
60 immunorejection. In order to evaluate the SDVG in a rabbit carotid model, we modified the  
61 SDVG design in terms of diameter, but not wall thickness and mechanical properties to match  
62 that of the rabbit carotids. Therefore, the rabbit carotid model has certain limitation to assess  
63 the grafting and bypass potential of the new SDVG, which are discuss in the manuscript (Lines  
64 625-640). Additionally, in the revised version of the manuscript, we discuss the necessity for  
65 testing on larger animal models, though we deem such tests out of the scope of the current  
66 work, and indeed such tests will require significant further funding and time.

67 Additional to the implantability study, we have added *in vitro* hemocompatibility results (lines  
68 451-499) and suturing retention strength (previously addressed in this response) to further  
69 support arterial grafting potential.

70 Taking into consideration the issue raised with respect of the subcutaneous implantation by  
71 the reviewer, we have further clarified the objective of that experimentation in the actual  
72 manuscript. For example, in lines 586-593 ("Cells remained viable during fabrication, and  
73 demonstrated proliferative and functional capacity within the SDVG (Fig. 8 and 9). In vivo  
74 immunogenicity experiments demonstrate that the encapsulation of BM-MSCs lowers the  
75 rejection and inflammation response cause by the subcutaneous implantation of an  
76 endotoxin-laden SDVG. The immunosuppression cell function is of importance in the design of a  
77 new vascular graft, considering a cause of graft failure is associated to chronic inflammatory  
78 response<sup>5</sup>. These results prove the importance of fabricating MSC-cellularized grafts to  
79 prevent rejection and enhance the functionality of the implant by promoting cell repopulation  
80 and definitive tissue remodeling after implantation<sup>74</sup>.") we discuss that the subcutaneous  
81 implantation model was used to evaluated the functional competence of encapsulated BM-  
82 MSCs, suggesting that cells are still functionally viable after the manufacturing process, but as  
83 well to demonstrated that BM-MSCs in the SDVG design could ameliorate inflammatory  
84 responses derived from graft implantation, which has been associated as one cause of  
85 vascular graft failure in clinic.

86

87 Reviewer #2 (Remarks to the Author):

88

89 This is an intriguing paper that reports a process for the construction of replacement arteries

90 that effectively mimic the mechanical characteristics of native arteries. The authors describe  
91 their innovative fabrication process and show that cells included in the resulting vessels  
92 continue to be functional. While the reported methods and results are exciting, there are  
93 numerous problems with grammar, word choice, and punctuation that sometimes make it  
94 difficult to understand the authors' intent; aside from this, the paper is outstanding. Specific  
95 issues to be addressed are described below.

96

97 Many of the figures (see 3, 4, and 5) and their associated captions are confusing since the  
98 authors don't specify the meaning of all of the curves included in the plots and/or the caption  
99 descriptions don't seem to accurately correspond with the content of the plots. These need to  
100 be checked and corrected for better comprehension.

101 Response: We thank the reviewer for his helpful comments. All figures and figure captions  
102 have been revised accordingly. We have revised the entire manuscript for improved clarity  
103 and to address the English throughout.

104 Also on line 174, the authors describe a pre-stretching step required to produce the  
105 characteristic J-shape of arteries, though little detail is given. It is not clear whether this was  
106 done during the fabrication itself, on a layer-by-layer basis as the vessel was formed, or just at  
107 the end of the fabrication process. This needs to be clarified. The paper should also specify  
108 and justify the extent of the pre-stretch utilized.

109 Response: We thank the reviewer for pointing this out. We have clarified the rationale behind  
110 and use of the pre-stretching step, hereon called preconditioning step. We now include in line  
111 206 the following: "In an effort to match the J-shape stress-strain curves<sup>18</sup>, a series of 24 PCL

112 fibre sublayers were deposited at +/-21° and preconditioned after fabrication by stretching  
113 cycles before subjecting the construct to longitudinal tensile testing.”, and in the materials  
114 and methods section in line 767 the following was included: “The preconditioning  
115 loading/unloading cycles of the outer graft layer in the longitudinal and circumferential  
116 direction were conducted to a strain level of 13% and 30%, respectively. Differences in strain  
117 level were iteratively adjusted to obtain the target J-shape strain-stress curves. In the case of  
118 the middle graft layer, the strain for preconditioning was 35% and 30% in the circumferential  
119 and longitudinal tensile testing, respectively. Uniaxial testing for both, circumferential and  
120 longitudinal samples, were performed at a constant rate of 10 mm/min (see Fig. S2a).”.

121 It is important to understand the effect of angled fibre deposition on mechanical properties in  
122 each of the layers and their pre-conditioning’ tests were devised to assess this at the level of  
123 the outer graft layer, middle graft layer and complete SDVG construct, as clarified in the text  
124 (Lines 234-236: “In order to define the structural configuration of the middle and outer graft  
125 layers of the new bio-inspired small diameter vascular graft (SDVG), iterative testing of  
126 differently layered constructs was performed in an effort to match the stress-strain profiles of  
127 the media and adventitia layers of human coronary arteries<sup>15</sup>” and lines 311-315: “Nonlinear  
128 and anisotropic mechanical response are maintained when tested together in the  
129 configuration of a full SDVG, comprising of inner, middle and outer graft layers, GEAL  
130 sublayers, with wavy, orientated PCL fibre sublayers and preconditioning. The construct  
131 exhibited mechanical response similar to human coronary arteries, both in longitudinal and  
132 circumferential directions under uniaxial tensile testing up to a 30% strain range (Fig. 7a-b).”)  
133 Briefly, for the outer, middle graft layer and complete SDVG formulations, prior to mechanical  
134 testing and after fabrication, layers were submitted to the pre-conditioning step (5 cycles of



135 30% strain). Beyond this, we have conducted pressurization testing, in which SDVG were  
136 previously submitted to 5 cycles of 30% strain in the longitudinal direction after being  
137 mounted cylindrically in the pressurization system coupled to the tensile machine (see  
138 material and methods line 796) and 5 cycles of 200 mmHG pressure loading prior to test. In an  
139 *in vivo* or clinical implantation setting, the pre-conditioning step may be obviated, although  
140 this has not been addressed in the actual study (line 548: “It may even be possible to conduct  
141 the preconditioning in situ on implantation by pulsatile blood pressure without need of  
142 previous preconditioning and is the subject of future studies.”).

143

144 It is not clear why the authors chose to perform uniaxial strip tests on the fabricated vessel  
145 material, instead of simply testing biaxial behavior. This should be justified.

146 Response: Indeed, biaxial mechanical testing would be more appropriate for mechanical  
147 analysis of vasculature tissues, as mentioned by the reviewer, especially as this type of tissue  
148 is submitted to biaxial stretching during pulsatile blood flow. However, and since our study  
149 strongly rely on previous experimental and theoretical studies based on uniaxial testing  
150 analysis, we decided to use equivalent experimental setting to guide our fabrication design in  
151 order to match the native mechanics.

152

153 Table 1 does not appear to be referenced in the text of the manuscript

154 Response: We thanks the reviewer for pointing this out. Table 1 is now referenced in the new  
155 manuscript in line 354 Quoted here: “Compliance values for SDVGs at 10% and 20% of axial  
156 stretching condition showed no statistical difference with reported results for human

157 coronary arteries (Table 1)."

158

159 It is not clear that the cells used in the fabrication are relevant. Why weren't vascular cells (i.e.  
160 endothelial cells, smooth muscle cells, fibroblasts) used?

161 Response: In fact, we did use endothelial cells, HUVECs cells (human umbilical vein  
162 endothelial cells), which are known to be more oxidative-stress and hypoxia sensitive cells  
163 than mesenchymal progenitor cells, therefore, if HUVECs are responding appropriately to the  
164 manufacturing technique in terms of viability, where hypoxic and free radicals are the main  
165 source of possible cell damage, we can argue with more certainty that our methodology is cell  
166 friendly or cell compatible. In regard to bone marrow mesenchymal stem cells (BM-MSCs),  
167 they have been chosen as the cell source in the cellularized SDVG design for being a less  
168 invasive source, easily expanded, immune-evasive allogenic cell type, capable to differentiate  
169 to vascular tissues and known to confer positive grafting results in previous vascular graft  
170 developments. We have now clarified the rationale behind all cell types used in the  
171 fabrication, *in vitro* and *in vivo* studies.

172 The rationale for the selection of HUVECs for the proliferation and LIVE/DEAD assay is now  
173 clarified in line 381 ("HUVECs were chosen for this study as they have been identified as more  
174 oxidative-stress and hypoxia sensitive cells than progenitor stem cells<sup>50-54</sup>, therefore more  
175 sensitive to free radical polymerization and hypoxic conditions presented during  
176 manufacturing. By performing this assay using HUVECs instead of progenitor cells (e.g. BM-  
177 MSCs), masking of the level of compatibility by high resistant cells is avoid, and it can be  
178 demonstrated with higher certainty that the biofabrication technique is cytocompatible.")

179 BM-MSCs cells were selected for the fabrication of SDVGs and for the immunomodulatory  
180 study in mice, the rationale behind this is now given in line 419 (“On the other hand, bone  
181 marrow mesenchymal stem cells (BM-MSCs) are known to have immunomodulatory activity;  
182 therefore, it is expected that immunoreaction in presence of this cell type in the SDVG be  
183 controlled and the effect of endotoxins ameliorated. It is important to remark that in this  
184 study, vascular cell functionality, such as contractility, was not under evaluation, instead  
185 functionality of BM-MSCs, known as an excellent cell source for vascular remodeling and  
186 regeneration<sup>56</sup> and considered within the SDVG design.”), and reinforced in line 587 (“In vivo  
187 immunogenicity experiments demonstrate that the encapsulation of BM-MSCs lowers the  
188 rejection and inflammation response cause by the subcutaneous implantation of an  
189 endotoxin-laden SDVG. The immunosuppression cell function is of importance in the design of a  
190 new vascular graft, considering a cause of graft failure is associated to chronic inflammatory  
191 response<sup>5</sup>”) and line 603 (“Additionally, mesenchymal stem cells (MSCs) can be encapsulated  
192 as a multipotent source of the biological component with the ability to differentiate to the  
193 desired tissues, assist in the recruitment and migration of patient’s cells by secreting different  
194 chemokines, and help in the formation of a definitive anti-thrombogenic inner layer after  
195 implantation<sup>74</sup>.”).

196 In general terms, vascular cells were not considered in this design due to potential  
197 immunorejection that these cells could generate in patients in any future clinical application.

198 In order to use autologous vascular cells, these cells need to be harvested from the same  
199 patient. This possibility is considered risky in terms of commercial and clinical viability, as cell  
200 harvesting and expansion would require invasive procedures, long-term cell culture and  
201 accompanying sterility issues, making the SDVG more expensive and less applicable for urgent

202 situations. iPS on the other hand, are potentially an excellent source for this application due to  
203 the low invasiveness of their harvesting procedure, however, reprogramming, expansion and  
204 differentiation are still long and expensive procedures for this application, without mentioning  
205 the high concern of potential teratoma formation. As identified for use in this study, donated  
206 BM-MSCs are considered less invasive, storable and immunotolerated. Additionally, these  
207 cells could differentiate, immunomodulate and assist tissue regeneration, being considered as  
208 key cells in the process of remodeling and tissue integration for tissue engineered grafts.

209

210

211 Please describe the details of the vessel culture from days 1 to 7.

212 Response: This has been added and detailed in the revised version in the materials and  
213 methods section, specifically in the cell culture sub-section in line 819 (“Cell culturing of  
214 complete or sectioned SDVGs were performed similarly, except that culture media was  
215 additionally supplemented with 1X amphotericin B (15290-026, Gibco, USA). This preventive  
216 measure was performed to mitigate exposure to microorganisms post fabrication.”).

217

218 Cell survival appears to be equated to function, but it should be made clear that vessel  
219 function (e.g. contractility) was not tested in this paper.

220 Response: We agree with this important comment. In the revised version, we have pointed  
221 out in the section “Engraftment potential of the encapsulated cells in an immunocompetent  
222 mice model” (line 414), more specifically in line 421 (“It is important to remark that in this  
223 study, vascular cell functionality, such as contractility, was not under evaluation, instead

224 functionality of BM-MSCs, known as an excellent cell source for immunomodulation and  
225 vascular remodeling and regeneration<sup>56</sup> and considered within the SDVG design.”), that  
226 vascular cell functionality has not been evaluated, and that cell survival and  
227 immunomodulatory functionality of encapsulated BM-MSCs has been measured to establish  
228 the cytocompatibility of the manufacturing method. However, we argue that BM-MSC  
229 function has been key in the process of remodeling and tissue fusion for other cellularized  
230 vascular grafts. We have expanded our discussion in line 589 (“The immunosuppressive cell  
231 function is of importance in the design of a new vascular graft, considering a cause of graft  
232 failure is associated to chronic inflammatory response<sup>5</sup>. These results prove the importance of  
233 fabricating MSC-cellularized grafts to prevent rejection and enhance the functionality of the  
234 implant by promoting cell repopulation and definitive tissue remodeling after implantation<sup>74”)</sup>  
235 and line 603 (“Additionally, mesenchymal stem cells (MSCs) can be encapsulated as a  
236 multipotent source of the biological component with the ability to differentiate to the desired  
237 tissues, assist in the recruitment and migration of patient’s cells by secreting different  
238 chemokines, and help in the formation of a definitive anti-thrombogenic inner layer after  
239 implantation<sup>74”)</sup>), arguing that BM-MSCs functionality could be a key element in the successful  
240 grafting of the new SDVG.

241

242 SIVG does not appear to be defined anywhere in the paper

243 Answer: Thank you very much for pointing out this omission. This has been corrected  
244 throughout in the revised manuscript.

245

246

247

248

249 Reviewer #3 (Remarks to the Author):

250

251 Title: Rapid fabrication of reinforced and cell-laden vascular grafts structurally inspired by  
252 human coronary arteries.

253 Authors: Akentjew, T.L., et al.

254

255

256 General Comments:

257 This is an interesting paper describing a combination of spinning and hydrogel technologies,  
258 that can deposit concentric layers of cell-laden hydrogels that are interspersed with re-  
259 inforcing fibres to provide mechanical strength.

260 Cell layers are contained in a methacryloyl gelatin-alginate (GEAL) substrate, while the

261 reinforcing fibres are made from slow-degrading polycaprolactone (PCL). The idea of

262 interspersing mechanically reinforcing fibres within a living tissue is novel and potentially

263 important. However, this paper has multiple drawbacks that limit enthusiasm substantially.

264 Overall, important information is lacking on the process, and the figures contain many errors

265 and substantially lack clarity. Missing important information includes: what is the diameter of

266 the grafts? How long does the graft manufacturing process take – can cells survive this

267 period? Is the process sterile? How big are the PCL fibres? This is difficult to infer from the

268 paper. What is the phenotype or appearance of the cells in the construct? There is zero

269 histological information. How were MSC harvested and characterized? No information on this  
270 either.

271 Also, there is overall a lack of care in preparation of the paper. The figure legends contain  
272 many errors, the statistical analysis is uneven and poor overall, and the Methods descriptions  
273 do not comport with the data in the paper. Overall, English grammar should be improved as  
274 well.

275

276 Response: We thank the reviewer for their helpful comments. We have conducted substantial  
277 revisions to address all of the issues pointed out. Specifically, concerning the diameter of the  
278 graft, this information was included in line 288 of the main manuscript (“The wall thickness of  
279 the SDVG was  $0.59 \pm 0.17$  mm, relatively similar to the combined thickness of the middle and  
280 outer graft layer fabricated separately, and the inner diameter  $3.6 \pm 0.5$  mm”).

281 Additionally, in regard to the manufacturing time, this information is now included in line 286  
282 (“The complete sterile SDVG fabrication (see material and methods) procedure took an  
283 average of 30 min to manufacture once the precursor solutions were prepared”), and  
284 discussed in line 617 (“The complete fabrication of an SDVG takes approximately 30 min.  
285 Furthermore, this manufacturing equipment has the potential for scale-up to fabricate more  
286 than one vascular graft at a time and can be adapted to a self-contained GMP manufacturing  
287 unit that can be even utilized in the surgery room or in semi-centralized manufacturing  
288 facilities close to healthcare centers. These advantages increase the feasibility of this  
289 manufacturing method, lowering cost and manufacturing time, attractive from the  
290 perspectives of commercialization and clinical translation.”).

291 Regarding the process sterility, this is now clarified in line 738 of materials and methods  
292 through a description of precautions taken for sterility maintenance, especially for  
293 experiments involving cell culturing or in vivo implantation, quoted here: “The whole  
294 manufacturing process was performed under sterile conditions within a biosafety cabinet,  
295 including the preparation of methacryloyl gelatin-alginate (GEAL) solution. After chemical  
296 modification, and initially during dialysis, the first hour of dialysis is performed using a water  
297 solution supplemented with 1% (v/v) chloroform for sterilization<sup>92</sup>. The prepared GEAL  
298 mixture was then submitted to 3 cycles of heating and cooling (20 min at 70°C and 20 min at  
299 4°C). Additionally, bioburden testing (Inoculation of SDVG extract in Blood agar, Sabouraud  
300 Dextrose Agar, Valtek, Chile) and mycoplasma testing (MycoAlert™ Mycoplasma Detection  
301 Kit, Lonza) were routinely performed for fabricated SDVG following provider instructions.  
302 SDVG constructs used for experiments with cells or animal models were treated with 1% (v/v)  
303 penicillin-streptomycin (15140-122, Gibco, USA) in culture media for 24 h.”.

304

305 Additionally, the information about dimensions of PCL fibre have been included in line 170  
306 (“PCL fibre sublayers fabricated with a target of +/- 21°, had resultant average fibres angles in  
307 the cylindrical construct of  $31 \pm 31^\circ$  (Fig. 3b) in one orientation and  $-28 \pm 32^\circ$  (Fig. 3c) in the  
308 opposite orientation, with average fiber diameter of  $698 \pm 253$  nm. The PCL fibre sublayer  
309 fabricated targeting +/- 67°, exhibited fibre angles of  $78 \pm 22^\circ$  (Fig. 3e), while the oppositely  
310 oriented fibres were  $-77 \pm 22^\circ$  (Fig. 3f), with an average fibre diameter of  $1.2 \pm 0.5 \mu\text{m}$ ”).

311 Phenotypic appearance and histological information has been informed now in the live/dead  
312 assay of encapsulated cells within different graft sublayer (Fig. 8) and histological analysis of



313 rabbit carotid grafted SDVG, respectively. The last one can be found in the new section  
314 “Implantability study in arterial circulation using a rabbit model” in line 502 and Fig. 10.

315 Finally, concerning the harvesting of BM-MSCs, we specify that BM-MSCs were commercially  
316 obtained from Lonza, and included the code and lot number in the material and methods  
317 section, in the cell culture sub-section, line 810 (“Human umbilical cord endothelial Cells  
318 (HUVEC) (ATCC® CRL1730™) and bone marrow derived mesenchymal stem Cells (BM-MSCs,  
319 expanded until passage 5) (#PT-2501, Lot# 0000423370, LONZA, USA) were cultured and  
320 expanded in high glucose Dulbecco’s Modified Eagle’s medium (DMEM) (16000-044, Gibco,  
321 USA) supplemented with 10%(v/v) fetal bovine serum (FBS) (16000-044, Gibco, USA), 2 mM  
322 glutamine (25030-081, Gibco, USA) and 1% (v/v) penicillin-streptomycin (15140-122, Gibco,  
323 USA), and incubated at 37°C, 5% CO<sub>2</sub> and 96% of humidity.”). Lonza provided a certificate of  
324 immunophenotypification and tridifferentiation following the ISSCR recommendations for this  
325 type of cells.

326 All figure legends have been corrected, as suggested too by the reviewer N° 2, and material  
327 and methods section improved following the reviewer’s suggestions, and addressed one-by-  
328 one below. Regarding statistical analysis, more detailed information has been added in  
329 material and methods (line 937: “Data are presented as mean  $\pm$  SD or mean  $\pm$  SEM, also  
330 indicated in the figure caption. Statistical significance was determined using two-tailed Mann-  
331 Whitney U test in compliance and cell density of bio-inspired SDVGs (Table 1, and Fig 8). Two-  
332 tailed Mann-Whitney U test was also applied for the in vivo immunosuppression functional  
333 experiments in the mouse model, platelet activation assay and clotting time assay (Fig 9, 10,  
334 respectively). All statistically analyzed data comply with the non-parametric Mann-Whitney U  
335 test. Platelet activation assay was performed utilizing 3 human blood samples from different

336 donors and conducted in experimental triplicates, whereas clotting time assay was done using  
337 4 human blood donors in experimental triplicates. Sample size calculations were determine  
338 using the on-line resource from IACUC of Boston University  
339 ([https://www.bu.edu/researchsupport/compliance/animal-care/working-with-](https://www.bu.edu/researchsupport/compliance/animal-care/working-with-animals/research/sample-sizecalculations-iacuc/)  
340 animals/research/sample-sizecalculations-iacuc/) <sup>98,99</sup>, with a power level of 95% and  
341 estimated variance from previous publications. Specifically for compliance experiments,  
342 estimated variance was determined based on Claes, E.<sup>45</sup> and van Andel, C. J. et al.<sup>46</sup>, whereas  
343 for the immunocompetent mice model was based on Campos-Mora, M. et al.<sup>96</sup>. All compared  
344 groups are considered to have similar data distribution. In the implantability study in arterial  
345 circulation using a rabbit model, results were presented as preliminary study, therefore only 2  
346 animals per group were performed and no statistical analysis presented.

347 All experimental outcomes were obtained after blinded quantitative analysis of samples  
348 results. For all statistically analyzed experiments, 95% of confidence was used and significance  
349 was denoted as \*P≤0.05, \*\*P≤0.01 and \*\*\*P≤0.001. “n” values for each experiment are  
350 informed in the figure caption.”), including as well the “n” values for each experiment and  
351 informed in the figure caption.

352

353 Specific Comments:

354 1. Line 123: the statement is made that the GEAL solution is pre-crosslinked, but then the  
355 authors state that the dipped layer is exposed to UV light to crosslink the material. please  
356 clarify.

357 Response: We thank the reviewer for pointing this out. The GEAL solution was not pre-  
358 crosslinked, we have now modified the body text to clarify this and revised Figure 2 to include  
359 the crosslinking/photo-crosslinking step within the vessel production sequence. We have  
360 clarified this in the manuscript in line 143: “Subsequently, the rod containing the orientated  
361 PCL fibre sublayers was immersed (dipped) into the GEAL solution and slowly retracted whilst  
362 spinning to allow homogenous GEAL layer photo-crosslinking using a lateral UV source (Fig.  
363 2b).”

364

365 2. The phrase “circumferential axis” is used throughout the paper and is unclear to this  
366 reviewer.

367 Response: This has now been clarified in the revised manuscript. Figure 1 has been revised  
368 with a scheme of the multilayer vascular graft, defining the circumferential axis for clarity.

369

370 3. After spraying the PCL layers, do the fibres fuse at the points of contact? What is the data  
371 for or against fibre fusion, which will significantly impact the vessel mechanical properties?  
372 What is the fibre diameter, is it uniform, how is it controlled?

373 Response: We thank the reviewer for pointing this out. We have included more detail  
374 concerning fibre morphologies, diameters and confirmed that the fibres are individualized by  
375 SEM and CT investigation (Fig. 4 and 6), however, some level of fusion between fibres cannot  
376 be discarded. We have expanded the text concerning the fibres and the implication of their  
377 fusion on mechanical properties. We have included those comments in line 295 (“The fibres  
378 are individualized, with minimal fibre fusion evident, according to SEM and CT (Fig. 4d and 6c,

379 repectively). Fibres fusion is an aspect of concern in the design of the SDVG, because fibres  
380 fusion would indeed impact the mechanical response, mainly due to force distribution  
381 amongst fibres at fixed contact points. Overall in the actual SDVG, free displacement of fibres  
382 would be possible during stretching and recoil.”). Fusion of the fibres can be controlled by  
383 fixing the distance between the SBS head (fibre emitting) and collection, if solvent evaporation  
384 is insufficient prior to hitting the target then some fusing of the fibres can occur; we specified  
385 the collection distance used here to obviate fibre fusion. Concerning fibre diameter, values  
386 fluctuate between 500 nm and 1800 nm approximately depending on the angular orientation  
387 of the SBS respect to the circumferential axis of the construct or rod. Information about the  
388 average values and standard deviation was included in line 170 (“PCL fibre sublayers  
389 fabricated with a target of +/- 21°, had resultant average fibres angles in the cylindrical  
390 construct of  $31 \pm 31^\circ$  (Fig. 3b) in one orientation and  $-28 \pm 32^\circ$  (Fig. 3c) in the opposite  
391 orientation, with average fiber diameter of  $698 \pm 253$  nm. The PCL fibre sublayer fabricated  
392 targeting +/- 67°, exhibited fibre angles of  $78 \pm 22^\circ$  (Fig. 3e), while the oppositely oriented  
393 fibres were  $-77 \pm 22^\circ$  (Fig. 3f), with an average fibre diameter of  $1.2 \pm 0.5 \mu\text{m}$ .”). Although we  
394 have not explored in this work the variable controlling the fibre diameters during  
395 manufacturing, except for deposition angle (see lines 174-181), it is known from previous  
396 research in SBS and electrospinning that solvent type and mixture and polymer concentration  
397 are typical variable by which diameter can be controlled.

398

399 4. The legend for Figure 4 is very confusing – panels a-c are stated as having data in the grey  
400 lines, but these lines are identical across the images, and the dotted lines are not described at

401 all. It is pretty impossible to tell what this figure is saying. Do the authors have data to show  
402 on actual stress-strain curves of native human coronary arteries?

403 Response: We are very thankful for the reviewer comments and get feedback concerning  
404 improvements of the figures. We have substantially revised all the figures in the manuscript  
405 for clarity, explaining in more details the data described by the plotted lines. The legend has  
406 been corrected too and clarified that the data of native human coronary were originated in  
407 previous published studies.

408 Specifically, concerning the caption of Fig. 4, we have added the modifications and the new  
409 caption resulted as follow: "Figure 4: Iterative improvement towards a J-shape stress-strain  
410 curve combining wavy fibre deposition and preconditioning: (a) Optical microscope image of  
411 a PCL fibre sublayer fabricated at a deposition angle of 21° after 1 cycle of fibre deposition  
412 with continuous clockwise rod spinning. (b) Optical microscope image of a PCL fibre sublayer  
413 fabricated at a deposition angle of 21° after 1 cycle of fibre deposition with alternated rod  
414 spinning and after the preconditioning step. (c) Scanning electron microscopy image of a  
415 series of 24 PCL fibre sublayers fabricated at a deposition angle of +/-67°. (d) Scanning  
416 electron microscopy image of a series of 24 PCL fibre sublayers fabricated at a deposition  
417 angle of +/-67° with alternated rod spinning and after the preconditioning step. (e)  
418 Longitudinal strain-stress curve of a series of 24 PCL fibre sublayers fabricated at a deposition  
419 angle of +/-21°, with and without a stretch preconditioning step of 5 cycles of  
420 loading/unloading at 30% strain and wavy fibre deposition using the alternating rod spinning  
421 during angled fibre deposition. The grey line represents previously published stress-strain  
422 mechanical behavior of the media layer of the human coronary artery under longitudinal  
423 tensile testing<sup>15</sup>."

424 As specified in the modified caption, human coronary data was obtained from a previous work  
425 (Holzapfel et al (2005)), in which 13 donated human coronary arteries were evaluated. From  
426 this data a constitutive mathematical model capable to describe the mechanical behavior in  
427 uniaxial tensile testing was obtained. In our work, mechanical tensile testing was applied in  
428 the same manner as their study, including strain rate as further detail in our response to  
429 referee 2.

430

431 5. Similarly the legend for Figure 5 makes no sense – the grey lines and solid squares that are  
432 talked about the in the legend simply aren't there in the figure. And, panels b-e contain  
433 multiple black lines of unclear significance- if these are replicates, then should not some error  
434 bars be included or something? In Figures 5 and 7, where is the “grey region of the range of  
435 the model of the mechanical properties” derived from? This is not at all clear to the reader,  
436 and serves only to confuse.

437 Response: All figures have been reworked, as addressed in our responses to reviewer N<sup>o</sup> 2.  
438 Specifically concerning this reviewer's comments for Fig 5 and 7: Black lines were replicates  
439 for the fabricated SDVG, which are expressed now as averages with their corresponding  
440 standard deviation. The grey zone (now light green zone) corresponds to the range of values  
441 obtained for native coronary arteries, which were extracted from previous work (Holzapfel et  
442 al (2005)). In our work, mechanical tensile testing was applied in the same manner as this  
443 study (Holzapfel et al (2005)), including pre-conditioning and strain rate. This was clarified in  
444 the caption and text. Additionally, legends were included in the figures to clarify the  
445 designation of colours and symbols. In figure 5, caption was modified and improved the clarity:

446 **“Figure 5: Stress-strain curves of the outer and middle graft layers based on GEAL reinforced**  
447 **PCL sublayers. a) Iterative improvement of the middle and outer graft layers: longitudinal**  
448 **tensile testing of the middle and outer graft layers using different numbers of middle and**  
449 **outer graft sublayers in the construct. Stress-strain curves of the outer graft layer consisting of**  
450 **different layer numbers. Grey dotted lines represent the average longitudinal stress-strain**  
451 **curve of the native adventitia (closed circles) and media (closed diamonds) layer of human**  
452 **coronary arteries<sup>15</sup>. b ) and c) Longitudinal and circumferential stress-strain curve of the outer**  
453 **graft layer composed of 5 graft (GEAL/PCL) sublayers. Green dashed lines in b and c represent**  
454 **the average longitudinal and circumferential stress-strain curves of the native media layer of**  
455 **coronary arteries<sup>15</sup>, respectively. d) and e) Longitudinal and circumferential stress-strain curve**  
456 **of the middle graft layer composed of 4 graft (GEAL/PCL) sublayers. The green dashed lines**  
457 **in d and e represent the average longitudinal and circumferential stress-strain curve of the**  
458 **native adventitia layer of human coronary arteries<sup>15</sup> respectively. (n=3). The shaded green**  
459 **zones in the figures represent the range of results obtained for native human coronary**  
460 **arteries<sup>15</sup>. Error bars = standard deviation, (n=3 independent experiments).”**

461 Concerning figure 7 caption was modified too and improved clarity:

462 **“Figure 7: Mechanical evaluation of the fabricated SDVG. a-b) Stress-strain curves of the SDVG**  
463 **(black line) and the human coronary artery in a) longitudinal and b) circumferential stretching**  
464 **directions (n = 5 independent experiments). The green dashed lines in a and b represent the**  
465 **longitudinal and circumferential stress-strain curve of native human coronary arteries<sup>46</sup>. The**  
466 **green shaded zones represent the range of results obtained for native human coronary**  
467 **arteries<sup>46</sup>. (c) Cyclic tensile testing in the circumferential direction. d-f) Profiles of diameter**  
468 **change ratio (D/D0) as function of pressure applied to the SDVG (black line, n = 5 independent**

469 experiments) compared with human coronary arteries (green dashed lines, n = 5 independent  
470 experiments)<sup>45,46</sup> at three different values of axial pre-stretch during testing (ez). d) ez=10% of  
471 axial pre-stretch.e) ez=20% of axial pre-stretch. f) ez =25% of axial pre-stretch. Error bars =  
472 standard deviation.”

473

474

475

476 6. In Table 1, what is the “n” value for these data? This bears on the statistical significance and  
477 differences.

478 Response: We thank the reviewer for pointing this out. This has now been corrected in Table 1  
479 of the revised manuscript, including details as to how the data was obtained. Specifically in  
480 table 1 caption the following was included: “Table 1: Bio-inspired small diameter vascular graft  
481 (n=5) and human coronary artery (n=5, data obtained from Claes, E.<sup>45</sup> and van Andel, C. J. et  
482 al.<sup>46</sup> compliance (%C) (10-2 mmHg) at different pressure ranges and longitudinal pre-stretch  
483 during testing (ez). Standard deviation is presented too ( $\pm$ ). ”.

484

485 7. Figure 8 needs scale bars. What is the meaning of the blue color – does this signal live or  
486 dead cells or proliferating cells? What are the dimensions of the construct? The reagent used  
487 does not show cell replication per se – it appears to show mitochondrial activity??

488 Response: We have revised the manuscript and re-worked Figure 8 to include a carefully  
489 annotated description in the caption of Figure 8. The dimensions of the graft are now clarified



490 in line 286 (“The complete sterile SDVG fabrication (see material and methods) procedure  
491 took an average of 30 min to manufacture once the precursor solutions were prepared. The  
492 wall thickness of the SDVG was  $0.59 \pm 0.17$  mm, relatively similar to the combined thickness of  
493 the middle and outer graft layer fabricated separately, and the inner diameter  $3.6 \pm 0.5$  mm.  
494 .”). Scale bars were included for the SDVG fluorescent image of SDVG in figure 8.

495 Additionally, the reviewer’s concern about proliferation assay and mitochondrial activity has  
496 been clarified in the manuscript in line 380 (“In order to evaluate the cell viability after  
497 manufacturing, a cell proliferation assay based on mitochondrial activity was performed post-  
498 fabrication.”), and line 390 (“Nevertheless, limited diffusion of nutrients and reagents of the  
499 proliferation kit within the graft must be taken into consideration; this could lead to an  
500 underestimation of the mitochondrial activity, hence cell survival and proliferation”).

501

502 8. Figure 9 shows cells counts from histology, but there are no histological images shown in  
503 the main paper. This is very disappointing.

504 Response: We thank the reviewer for pointing this out. Histological images of rabbit carotid  
505 grafted SDVG are presented now in section “Implantability study in arterial circulation using a  
506 rabbit model” (line 502) and supporting information (Fig. S8). These images correspond to  
507 H&E staining of cellularized SDVG after 14 and 30 days post-implantation (Fig. 10h,i), and H&E  
508 staining of acellularized (Fig S8a) and cellularized SDVG (Fig S8b) after 30 days post-  
509 implantation. On the other hand, cell counting presented in figure 9, corresponds to cells  
510 obtained from graft-draining lymph nodes to evaluate the level of immunoreaction. This has  
511 been clarified in the caption and as well in line 425 (“Analysis of immunocompetent mice with

512 dorsal subcutaneous implantations demonstrate that SDVGs with encapsulated endotoxins  
513 and without BM-MSCs induced graft rejection when implanted subcutaneously, characterized  
514 by a lack of graft incision healing (see Fig. S7a), an increased number of total cells isolated  
515 from graft-draining lymph nodes (dLNs) (mouse axillary and brachial lymph nodes), and an  
516 increased percentage of CD4+ memory T cells and B cells in dLNs compared to BM-MSCs  
517 cellularized graft (Fig. 9 b, c, and d respectively) ”

518

519 9. In the Methods section, the Histology paragraph talks about skin transplants and positive  
520 controls for immunity, and talks about FACS analysis using different markers for immune cells,  
521 but none of this data is shown in the paper. It appears as if this text was taken from another  
522 manuscript, since it does not match up with the data in this paper?

523 Response: We thank the reviewer for pointing this out. This mistake has been corrected in  
524 substantially revised materials and methods section, and as well further clarified in the  
525 caption of Figure 9. Concerning the Figure 9, the following underlined modifications has been  
526 included:

527 “Figure 9. Descriptions of immune results. (a) Schematic overview of the experimental  
528 immune challenge to assess the immunomodulatory function of laden BM-MSC in the SDVG.  
529 (b) Number of cells in dLN. (c) Frequency of CD62L- CD44+ cells within CD3+ CD4+ cell  
530 population, corresponding to memory T Cells. (d) Frequency of CD19+ cells in dLN,  
531 corresponding to B cells. (e) Frequency of CD25+ cells within CD3+ CD4+ cell population,  
532 corresponding to activated T cells. (f) Frequency of CD62L+ CD44- cells within CD3+ CD4+ cell  
533 population, corresponding to naïve T Cells. (g) Frequency of CD25high Foxp3+ cells within

534 CD3+ CD4+ cell population, corresponding to regulatory T cells. Naïve = non-operated control  
535 mice; Suture control = operated mice without any graft; Allogeneic = operated mice with  
536 allogeneic skin graft. Error bars = standard error of the mean. \* p<0.05; \*\* p<0.01; ns: non-  
537 significant. n=5 animals with 5 different SDVG fabrications. Statistical analysis was conducted  
538 using the Mann–Whitney U test.”

539

Reviewers' comments:

Reviewer #1 (Remarks to the Author):

The authors are commended for performing additional SVDG strength characterization and a rabbit carotid artery interpositional implantation study. The reported strength values are reasonable albeit lower than for other TEVG that have attained large animal testing. Unfortunately, acute clotting of the grafts in the rabbit model indicates the graft, despite its noteworthy structure and compliance properties, is not yet a successful TEVG in terms of a large animal implantation; thus, the study, while comprehensive and well presented, is of limited significance given the state of the TEVG field, and I do not think its probable impact merits publication in Nature Communications.

Reviewer #2 (Remarks to the Author):

This is an exciting paper describing an innovative approach for fabrication of vascular grafts that effectively mimic the mechanical response of native vessels and provide a scaffold for vascular cells to function and remodel. The authors have effectively responded to the reviewers' recommendations, and the manuscript is substantially improved, particularly with inclusion of additional results addressing graft strength and performance in a rabbit model. There are still some grammatical issues here and there, but they are not so extensive as to lead to confusion.

One minor suggestion: Please define (in the figure caption) the angle alpha shown in Figure 1. Is it the parameter associated with the angles referenced in the caption for Fig. 1?

Ken Monson

Reviewer #3 (Remarks to the Author):

Title: Rapid fabrication of reinforced and cell-laden vascular grafts structurally inspired by human coronary arteries.

Authors: Akentjew, T.L., et al.

General Comments: This is a substantially revised manuscript regarding the use of electrospinning techniques to create PCL-gel composite tissues with mechanics similar to native artery. The changes in response to the previous review are extensive, and so this reads almost like a new paper.

Compared to the prior submission, the clarity of the procedures and the characterization of the scaffolds, particularly the mechanical characterization, are vastly improved. This reviewer is again impressed at the extent to which a biological approach to orientation of PCL fibers led to expected and predicted compliance properties. In addition, the mechanical properties of these small-diameter conduits do now appear to be compatible with arterial implantation. As such, this material characterization and the methodology combine to make this an important advance for research in the area of synthetic arterial grafts.

But while there are many improvements, there are some new weaknesses in the paper, mostly pertaining to the biological characterization of the materials. To remedy some of these deficiencies, it would be suitable (in this reviewer's opinion) to simply remove some of the confusing biological data, since it does not add significantly to the important parts of this story as it currently stands. In addition, the paper is now QUITE LONG, and should be streamlined to about half of its length, in terms of text. Specific comments below.

Specific Comments:

1. In Figure 5, providing more explicit labels on the y-axes would help readers understand which wall stress they were looking at.
2. Figure 6 does not add a lot to the paper, and could be omitted or moved to a supplement.
3. Figure 7 – again, more explicit y-axis labels, with directionality for panels a-c, and with amount of pre-stretch for panels d-f.
4. Table 1 could be omitted, as not adding a lot to the figures already presented.
5. English language correction, line 396, should read: “highly resistant cells is avoided”
6. Regarding results in lines 394-406, it should be noted that 0.02 – 0.2% survival is still very poor for HUVEC in the construct. Is poor survival the reason that HUVEC were abandoned for later implantations? Also, what was the survival of BM-MSC when implanted into the constructs?
7. The authors seem to have an incomplete appreciation of the effects of endotoxin. In lines 430-444, there is discussion of endotoxin, MSC, rejection, etc. Some corrective observations:
  - a. HUVEC will be susceptible to endotoxin – it is toxic to endothelium
  - b. Endotoxin is a strong inducer of inflammation, but not of adaptive immunity, per se. Therefore, the B- and T-cells that migrated to the implant were likely part of a non-specific inflammatory response, rather than part of an actual rejection event. If the implants did not have cells, then rejection, in the proper sense, could not have occurred.
  - c. Adding MSC to this cocktail may have resulted in fewer cells on FACS, but the meaning of this observation is really not clear.
  - d. This reviewer would recommend that the cutaneous implants be struck from the paper, since they do not add value in terms of understanding of the construct, and provide some confusing information.
8. For the rabbit carotid implants, it is worthwhile to point out that endotoxin itself can induce endothelial inflammation and hence thrombosis. This may have been why all of the implanted grafts clotted within a short time period. The amount of endotoxin in the constructs should be quantified to gain a better understanding of what is going on here.

Reviewers' comments:

Reviewer #1 (Remarks to the Author):

The authors are commended for performing additional SDVG strength characterization and a rabbit carotid artery interpositional implantation study. The reported strength values are reasonable albeit lower than for other TEVG that have attained large animal testing. Unfortunately, acute clotting of the grafts in the rabbit model indicates the graft, despite its noteworthy structure and compliance properties, is not yet a successful TEVG in terms of a large animal implantation; thus, the study, while comprehensive and well presented, is of limited significance given the state of the TEVG field, and I do not think its probable impact merits publication in **Nature** Communications.

Response: We thank the reviewer for their positive comments regarding our additional investigation to strength characterization and the rabbit carotid study.

Although we understand the author's concern pointing to the fact that the paper is not showing a successful long-term patency in a large animal model, the main focus of the manuscript is the new technology based on an innovative combination of modular and automated technologies capable to produce a tissue engineered product with standardized features, which are broadly considered essential for the efficacy of a vascular graft. We present results that show good potential towards clinical usage, specifically, platelet activation, coagulation, burst pressure, suture strength and hemostasis. Additionally, the main manuscript argues at the end of the discussion section about possible reasons that could cause the thrombus formation, basically indicating that a carotid rabbit model is not optimal for evaluating long-term patency especially for an engineered graft with mechanics and wall sizes corresponding to human coronary arteries. Therefore, it is mentioned too that only in a large animal models, the *in vivo* relevance of mechanical matching and the graft design will be fully demonstrated, which is part of our ongoing research, moving beyond the scope of the current manuscript. In regard to the possible reasons that caused the thrombus formation after 12 h, we included in the previous revision that luminal unalignment of the SDVG and the native rabbit carotid at the anastomosis zone could cause blood recirculation and stagnation, therefore, coagulation (see lines 554-556 in the new revision). In this new version, we have additionally included a second possible cause, which refers to inflammation-induced thrombogenesis due to the endotoxin levels of the SDVG (see lines 558-566 in the new revision). To complement the discussion, we quantified and reported the endotoxin level in fabricated SDVG and performed *in vivo* immunogenicity assay to evaluate the immune reaction. These results were included in the new manuscript and new supporting information, respectively, and

concluded that inflammation cannot be discarded as a possible cause of thrombus formation in the present study.

The technology presented in this manuscript is a unique rapid manufacturing process that integrate the use of natural biomaterial and cells simultaneously, conforming a disruptive strategy to overcome standardization, manufacturing control, regulatory and commercial hurdles present in the tissue engineered field, which in combination could reduce the gap for this type of product to commercialization and impact in the public health.

Reviewer #2 (Remarks to the Author):

This is an exciting paper describing an innovative approach for fabrication of vascular grafts that effectively mimic the mechanical response of native vessels and provide a scaffold for vascular cells to function and remodel. The authors have effectively responded to the reviewers' recommendations, and the manuscript is substantially improved, particularly with inclusion of additional results addressing graft strength and performance in a rabbit model. There are still some grammatical issues here and there, but they are not so extensive as to lead to confusion.

One minor suggestion: Please define (in the figure caption) the angle alpha shown in Figure 1. Is it the parameter associated with the angles referenced in the caption for Fig. 1?

Response: We thank the reviewer for his comments. We have revised the manuscript for grammatical and English errors throughout.

Additionally, we have included a definition for the angle alpha in the revised caption of figure 1, that effectively correspond to the deposition angle as stated by the reviewer.

"Figure 1: Scheme composition of the middle and outer graft layers. The middle graft layer comprises a series of four PCL/GEAL sublayers, hereafter called middle graft sublayers, with fibres deposited at angles of +/- 21° and GEAL sublayer generated after two cycles of dipping and photo-crosslinking. The outer graft layer is composed of a series of five PCL/GEAL bilayers, hereafter termed outer graft sublayers, with fibres deposited at angles of +/- 67° and GEAL sublayer generated after three cycles of dipping and photo-crosslinking. The deposition angle is represented by " $\alpha$ ".

Reviewer #3 (Remarks to the Author):

Title: Rapid fabrication of reinforced and cell-laden vascular grafts structurally inspired by human coronary arteries.

Authors: Akentjew, T.L., et al.

General Comments: This is a substantially revised manuscript regarding the use of electrospinning techniques to create PCL-gel composite tissues with mechanics similar to native artery. The changes in response to the previous review are extensive, and so this reads almost like a new paper.

Compared to the prior submission, the clarity of the procedures and the characterization of the scaffolds, particularly the mechanical characterization, are vastly improved. This reviewer is again impressed at the extent to which a biological approach to orientation of PCL fibers led to expected and predicted compliance properties. In addition, the mechanical properties of these small-diameter conduits do now appear to be compatible with arterial implantation. As such, this material characterization and the methodology combine to make this an important advance for research in the area of synthetic arterial grafts.

But while there are many improvements, there are some new weaknesses in the paper, mostly pertaining to the biological characterization of the materials. To remedy some of these deficiencies, it would be suitable (in this reviewer's opinion) to simply remove some of the confusing biological data, since it does not add significantly to the important parts of this story as it currently stands. In addition, the paper is now QUITE LONG, and should be streamlined to about half of its length, in terms of text. Specific comments below.

Specific Comments:

1. In Figure 5, providing more explicit labels on the y-axes would help readers understand which wall stress they were looking at.
2. Figure 6 does not add a lot to the paper, and could be omitted or moved to a supplement.
3. Figure 7 – again, more explicit y-axis labels, with directionality for panels a-c, and with amount of pre-stretch for panels d-f.
4. Table 1 could be omitted, as not adding a lot to the figures already presented.



5. English language correction, line 396, should read: "highly resistant cells is avoided"

6. Regarding results in lines 394-406, it should be noted that 0.02 – 0.2% survival is still very poor for HUVEC in the construct. Is poor survival the reason that HUVEC were abandoned for later implantations? Also, what was the survival of BM-MSC when implanted into the constructs?

7. The authors seem to have an incomplete appreciation of the effects of endotoxin. In lines 430-444, there is discussion of endotoxin, MSC, rejection, etc. Some corrective observations:

a. HUVEC will be susceptible to endotoxin – it is toxic to endothelium  
b. Endotoxin is a strong inducer of inflammation, but not of adaptive immunity, per se. Therefore, the B- and T-cells that migrated to the implant were likely part of a non-specific inflammatory response, rather than part of an actual rejection event. If the implants did not have cells, then rejection, in the proper sense, could not have occurred.

c. Adding MSC to this cocktail may have resulted in fewer cells on FACS, but the meaning of this observation is really not clear.

d. This reviewer would recommend that the cutaneous implants be struck from the paper, since they do not add value in terms of understanding of the construct, and provide some confusing information.

8. For the rabbit carotid implants, it is worthwhile to point out that endotoxin itself can induce endothelial inflammation and hence thrombosis. This may have been why all of the implanted grafts clotted within a short time period. The amount of endotoxin in the constructs should be quantified to gain a better understanding of what is going on here.

Response: We thank the reviewer for their helpful comments. As suggested by the reviewer, we have moved some biological data from the main manuscript and included in the supporting information (see below for further details). Additionally, we have clarified and simplified the information obtained from the immunogenicity assays and presented in the main manuscript (complete results are included now in the supporting information). Also, we have shortened the text in about 1500 words to adjust to the length of other tissue engineering related papers previously published in Nature Communication and performed new experiment to tackle the endotoxin issue in this work. Following the specific comments, we have undertaken the following modification, addressed here comment by comment (reviewer #3 comments in blue):

Reviewer #3 comment 1. In Figure 5, providing more explicit labels on the y-axes would help readers understand which wall stress they were looking at.

- Following the reviewer's suggestions, a schematic representation of the direction of tensile testing was included in our now revised figures 3, 4, 5 and 6 for clarity.

Reviewer #3 comment 2. Figure 6 does not add a lot to the paper, and could be omitted or moved to a supplement.

- Figure 6 of the previous submitted manuscript was removed from the main manuscript as suggested by the reviewer and is now included in supporting information.

Reviewer #3 comment 3. Figure 7 – again, more explicit y-axis labels, with directionality for panels a-c, and with amount of pre-stretch for panels d-f.

- Please see our response to reviewer #3 in comment 2.

Reviewer #3 comment 4. Table 1 could be omitted, as not adding a lot to the figures already presented.

- Following the reviewer's suggestion, Table 1 has been removed and is now included in the supporting information.

Reviewer #3 comment 5. English language correction, line 396, should read: "highly resistant cells is avoided".

- After shortening the main manuscript, line 396 has been removed, therefore, the specific language correction was not necessary.

Reviewer #3 comment 6. Regarding results in lines 394-406, it should be noted that 0.02 – 0.2% survival is still very poor for HUVEC in the construct. Is poor survival the reason that HUVEC were abandoned for later implantations? Also, what was the survival of BM-MSC when implanted into the constructs?

- Although we have removed this part from the newly revised manuscript, the following discussion is necessary to be raised in order to clarify the reviewer's concern. In the previous submitted manuscript, we have attributed the low signal of metabolic activity to the limited diffusion of reagents of the proliferation kit within the graft; this could lead to an underestimation of the mitochondrial activity of cells within the graft. This is particularly true for encapsulated cells within hydrogels with limited solvent access. However, we cannot discard that the lack or decrease in the capacity of WST-1 reduction of cells is derived either from a metabolic resting induced by a free radical-derived oxidative stress during photo-crosslinking (1. Cell Cycle. 2015 Jul 3; 14(13): 2022–2032 2. Ann Biomed Eng. 2017 Feb; 45(2): 360–377. 3. Gene 337 (2004) 1 – 13), or by NADH depletion in response to higher concentration of free radicals and hypoxia after photo-crosslinking (1. [FASEB J.](#) 2009 Sep; 23(9): 3159–3170. 2. Free Radic Biol Med.

2015 Feb; 0: 281–291), or simply by an interference of the photoinitiator-derived free radical with the reduced form of the 1-Methoxy-5-methylphenazinium methyl sulfate during the electron transfer in the reduction process of WST-1 to formazan. Although these phenomena could occur in conjunction and affect the reduction of WST-1 during the assay, viability measurement based on assays that evaluate membrane integrity still indicate that cells are viable (please see Figure 7 of the new manuscript). Considering the mentioned doubts about the proficiency of this method in measuring cell viability in the actual cell-encapsulation scenario, and the fact that the cell viability and compatibility of cells within GelMA hydrogels has been previously explored by this group (Biofabrication. 2016 Dec 1;9(1):015001) and other research groups (Biomaterials. 2010 Jul;31(21):5536-44), we have decided to include only live/dead assay and immunosuppression functionality in the *in vivo* model as proofs of viability of cells in the present manuscript.

Concerning the decision of abandoning HUVECs in the final SDVG design, this is not related to the survival of HUVECs but to the expected and more appropriate role of BM-MSCs in the final design with potential regenerative activity after implantation. Reasonings in this regard are included in the new revision:

In lines 363-383:

"Having considered the incorporation of a cellular component essential for the design and successful outcome in a transplantation scenario<sup>32,49,50</sup>, important practical implication must be taken into account when choosing an appropriate cell type. Although autologous vascular cells are the preferable choice, invasive harvesting and long-term culturing, specially for elderly patients, make this option risky in terms of commercial and clinical viability. Induced pluripotent stem cells on the other hand, are potentially an excellent source for this application<sup>51</sup> due to the low invasiveness of their harvesting procedure and autologous nature, however, reprogramming, expansion and differentiation are still a long and expensive procedures, and the frequency of point mutations<sup>52</sup> has generated serious concern about the safety of these cells. Allogenic bone marrow mesenchymal stem cells (BM-MSCs) are considered less invasive, storable, economically feasible, immunotolerated, and have been physiologically implicated in vascular repair and remodeling<sup>53</sup>. Additionally, BM-MSCs are known to have immunomodulatory activity; therefore, it is expected that immunoreaction or inflammation in presence of this cell type in the SDVG would be controlled or ameliorated. In this regard, BM-MSCs has been proposed in this study as a source of biological function for the actual SDVG design. Analysis of

immunocompetent mice with dorsal subcutaneous implantations has demonstrated that SDVGs with encapsulated BM-MSCs are capable to control an inflammatory response, whereas non-cellularized SDVG not (see Fig. S9, S10 and supporting information for further details). This demonstrates also that cells maintain their viability and functionality after being subjected to the manufacturing process. It is important to remark that in this study, vascular cell functionality, such as contractility, was not under evaluation, instead functionality of BM-MSCs, known as an excellent cell source for immunomodulation, vascular remodeling and regeneration<sup>54</sup>.

In regard to the BM-MSCs survival, quantification of live cells was included in the new manuscript in lines 340-344: "Using this time bone marrow-derived mesenchymal stem cells (BM-MSCs), and a LIVE/DEAD® cell staining assay, viability analysis of cells located within different sublayers of the fabricated SDVG was performed at different time points of static cell culturing (Fig. 7f-h). Evaluation on day 7, 14, 21 and 28 resulted in 71, 84, 87 and 92% viability respectively (Fig. S8). These results confirm cells survival and even proliferative capacity on day 28 post fabrication (Fig 7i)".

Reviewer #3 comment 7. The authors seem to have an incomplete appreciation of the effects of endotoxin. In lines 430-444, there is discussion of endotoxin, MSC, rejection, etc. Some corrective observations:

Considering the reviewer's suggestion, the subcutaneous implantation was moved to the supporting information and taken only as an additional information to prove the immunosuppressive capacity of BM-MSCs in the present construct. Additionally, the used of a low endotoxin alginate for the SDVG construct was specified in the materials and methods section in lines 593-594 and 600-602, clarifying too that the use of an alginate with higher level of endotoxin was only for the subcutaneous assay in the context of testing the immunosuppressive activity of encapsulated BM-MSCs.

Reviewer #3 comment 7a. HUVEC will be susceptible to endotoxin – it is toxic to endothelium.

Comment 7a: Although the LPS toxicity on endothelial cells has been previously established by other authors (Infect Immun. 1993 Aug; 61(8): 3149–3156.), in this investigation, low endotoxin alginate has been used in the fabrication of SDVG, as mentioned previously, therefore, the authors of this article did not consider the possible toxicity of endothelial cells after the SDVG implantation. However, discussion and experimental proofs regarding this point are mentioned in the paper and in this document further below.

Reviewer #3 comment 7b. Endotoxin is a strong inducer of inflammation, but not of adaptive immunity, per se. Therefore, the B- and T-cells that migrated to the implant were likely part of a non-specific inflammatory response, rather than part of an actual rejection event. If the implants did not have cells, then rejection, in the proper sense, could not have occurred.

As well mentioned by the reviewer, and due to the nature of the implanted acellular SDVG, effectively, we should not talk about rejection, therefore, we have changed this concept for inflammation and wound healing, when it comes to consider evaluations of the faster incision closure for cellularized SDVG. These changes are listed below:

- In lines 375-382 of the main manuscript: "Analysis of immunocompetent mice with dorsal subcutaneous implantations has demonstrated that SDVGs with encapsulated BM-MSCs are capable to control an inflammatory response, whereas non-cellularized SDVG not (see Fig. S9, S10 and supporting information for further details). This demonstrates also that cells maintain their viability and functionality after being subjected to the manufacturing process. It is important to remark that in this study, vascular cell functionality, such as contractility, was not under evaluation, instead functionality of BM-MSCs, known as an excellent cell source for immunomodulation, vascular remodeling and regeneration<sup>54</sup>."
- In Supporting information, subsection "Results of immunosuppressive activity of the encapsulated cells in the SDVG", the following has been included: "Analysis of immunocompetent mice with dorsal subcutaneous implantations demonstrate that SDVGs with encapsulated endotoxins and without BM-MSCs induced a graft-derived inflammatory reaction, characterized for instance by a delayed graft incision healing (see Fig. S9a), an increased number of total cells isolated from graft-draining lymph nodes (dLNs) (mouse axillary and brachial lymph nodes), and an increased percentage of CD4+ memory T cells and B cells in dLNs compared to BM-MSCs cellularized graft (Fig. S10 b, c, and d respectively). Whereas subcutaneously implanted SDVGs with encapsulated BM-MSCs, exhibited no signs of inflammation and the incision healed after 14 days (Fig. S9b). Reduced cell numbers in dLNs, and an augmented percentage of activated CD4+ T cells, CD4+ naïve T cells, and CD4+ regulatory T cells (Fig. S10 e, f and g respectively) compared to implanted acellularized grafts was also found. These results, and considering the immunophenotypic data of allogeneic skin graft, known for conducting inflammation and immune rejection<sup>7,8</sup>,

suggests that an immunomodulation is being carried out by the viable and functional encapsulated BM-MSCs, mainly characterized by an immunotolerance of the endotoxin-laden graft<sup>9</sup>, decreased presence of B-cells<sup>10</sup> and increased presence of regulatory T cells in dNLS<sup>11</sup>, all previously described as functions of BM-MSCs."

In regard to the increase of T-cells and B-cells induced by the presence of endotoxin in the subcutaneously implanted SDVG, we agree with the reviewer about the non-specific inflammatory response as the main cause of increased number of immune cells. In the succession of event after incision, it has been reported that within the first week, recruitment of antigen-presenting cells, T-cells (J Immunol. 2010 May 15; 184(10): 5423–5428.) and B-cells (Wound Repair Regen. 2017 Sep; 25(5): 774–791) may occur as a non-specific respond. However, LPS is considered a strong adjuvant with implication in clonal expansion of T-cells for example (Crit Rev Immunol. 2008; 28(4): 281–299), either derived from presentation of SDVG biomaterial antigens or unknown antigen expressed on damaged keratinocytes (J Immunol. 2010 May 15; 184(10): 5423–5428.). Nevertheless, these considerations are included in the new manuscript, describing the phenomenon more as a non-specific inflammatory reaction and not as an implant rejection.

Reviewer #3 comment 7c. Adding MSC to this cocktail may have resulted in fewer cells on FACS, but the meaning of this observation is really not clear.

Although we have move these results and discussion to supporting information, we have included an explanation in supporting information referring to the immunomodulatory effect of BM-MSCs in the inflammatory reaction triggered by the implantation of endotoxin-laden SDVG:

".....suggests that an immunomodulation is being carried out by the viable and functional encapsulated BM-MSCs, mainly characterized by an immunotolerance of the endotoxin-laden graft<sup>6</sup>, decrease in the number of dLN cells, decreased presence of B-cells<sup>7</sup> and increased presence of regulatory T cells in dNLS<sup>8</sup>, all previously described as functions of BM-MSCs....."

Additionally, we have simplified the message of these results in the main manuscript in order not to deviate the focus of the study:

In lines 375-382: "Analysis of immunocompetent mice with dorsal subcutaneous implantations has demonstrated that SDVGs with encapsulated BM-MSCs are capable to control an inflammatory response, whereas non-cellularized SDVG not (see Fig. S9, S10 and supporting information for further details). This demonstrates

also that cells maintain their viability and functionality after being subjected to the manufacturing process. It is important to remark that in this study, vascular cell functionality, such as contractility, was not under evaluation, instead functionality of BM-MSCs, known as an excellent cell source for immunomodulation, vascular remodeling and regeneration<sup>54</sup>.

In lines 516-520: "*In vivo* immunogenicity experiments (Fig. S10) demonstrate that the encapsulation of BM-MSCs lowers the inflammation response potentially caused by the implantation. The immunosuppressive cell function is of importance in the design of a new vascular graft, considering that a cause of graft failure is associated to chronic inflammatory response<sup>5</sup>"

Reviewer #3 comment 7d. This reviewer would recommend that the cutaneous implants be struck from the paper, since they do not add value in terms of understanding of the construct, and provide some confusing information.

This section was moved to the supporting information and referred in the main manuscript as an experimental proof of the functionality of encapsulated BM-MSCs and for the possible role in controlling inflammation after implantation. Please see responds to comments 7c.

Reviewer #3 comment 8. For the rabbit carotid implants, it is worthwhile to point out that endotoxin itself can induce endothelial inflammation and hence thrombosis. This may have been why all of the implanted grafts clotted within a short time period. The amount of endotoxin in the constructs should be quantified to gain a better understanding of what is going on here.

The following discussion was included in the discussion section in relation to the possible cause of thrombus formation:

In lines 545-573: "Although patency was only observed after a 12 h period (Fig 8), the new manufactured SDVG has proven suitable in terms of maximal burst pressure (Fig S6), suture retention (Fig S7), hemocompatibility and blood leak-proof grafting demonstrated by *in vivo* rabbit models (see Fig 8). The rabbit model was applied here as it has been considered adequate for studies of small diameter vascular conduits due to the good similarity in thromboplastic and fibrinolytic properties with humans<sup>78</sup>. Although the diameter of the coronary-like SDVG was adjusted in this study to test the grafting capability in a carotid rabbit model, graft wall thickness and mechanical properties were tailored towards the human coronary artery. Suturing conduits of equivalent diameters but with dissimilar wall thickness, could result in luminal unalignment between the graft and anastomosed natural vessel (see Fig. 8d). This is especially true for 1.5 mm conduits in diameter,

even for a highly skilled and trained vascular surgeon. Unaligned luminal edges generate protruding obstacles for the laminal blood flow vectors at the anastomosis, creating recirculation and stagnation zones. According to previous studies, recirculation and stagnation points intensify the thrombus formation<sup>79</sup>. Although still conjectural, this could be the reason of short patency of SDVG in the rabbit carotid model, considering that even for ePTFE vascular prostheses, patency in this model is retained for longer than 1 week<sup>80</sup>. Another possibility could be associated to exacerbated inflammatory reaction and acute thrombogenesis<sup>81</sup> after implantation of the SDVG and triggered by the presence of traces of endotoxin in alginate or GelMA<sup>82</sup>. Notwithstanding that GelMA was carefully prepared and a low endotoxin alginate selected, SDVG constructs were submitted to endotoxin level quantification and *in vivo* immunogenicity study utilizing the complete SDVG constructs and its individual components (GelMA, alginate, PCL) (see Fig. S12). Although the endotoxin level present in the SDVG (3.11 EU/ml), which is in the range that a previous study reported induction of inflammatory reaction in macrophages<sup>82</sup>, the *in vivo* immunogenicity results showed a low immune reaction for all individual components of the SDVG and the complete SDVG (Fig S12). Therefore, the conclusion that the short-term patency due to thrombus formation is in response to an exacerbated immunoreaction cannot be discarded. In this regard, use of endotoxin-free biomaterials and additional endotoxin control strategies will be required for further translational potential.

Although long-term grafting evaluation is required to demonstrate the efficacy of the bio-inspired SDVG design, these preliminary results show good potential towards clinical usage. Next steps in the development of this SDVG would certainly demand the use of larger and clinically relevant animal models with experimental follow up longer than a year<sup>68,83,84</sup>.

In this regard, and according to the previous quoted section, we have included the presence of endotoxin as a possible cause of thrombogenesis, and also measured the level of endotoxin in the SDVG construct. Additionally, we have correlated this level of endotoxin with *in vivo* results in which individual material components and the complete SDVG, including the low endotoxin alginate, were tested for immune reaction in the same subcutaneous mice model, not clearly showing the exacerbated increment of lymphocytes counting in dLN as observed in SDVG fabricated with alginate with higher level of endotoxins.



REVIEWERS' COMMENTS:

Reviewer #3 (Remarks to the Author):

The authors have now addressed all of the comments of this reviewer, and the manuscript has been suitably revised.
